# Supplementary material for: Surface amino-functionalization of Sn-Beta zeolite catalyst for lactic acid production from glucose
Source: Royal Society of Chemistry journal article supplement (doi:10.1039/c9ra01264h), 2019-01-01
Supplement: c9ra01264h1.pdf [file c9ra01264h1.pdf]

## SUPPORTING INFORMATION

### Surface Amino-Functionalization of Sn-Beta Zeolite Catalyst for Lactic Acid Production from Glucose

Zheng Shen,<sup>ab</sup> Ling Kong,<sup>a</sup> Wei Zhang,<sup>b</sup> Minyan Gu,<sup>a</sup> Meng Xia,<sup>b</sup> Xuefei Zhou<sup>b</sup> and Yalei Zhang<sup>\*ab</sup>

#### Supporting figures

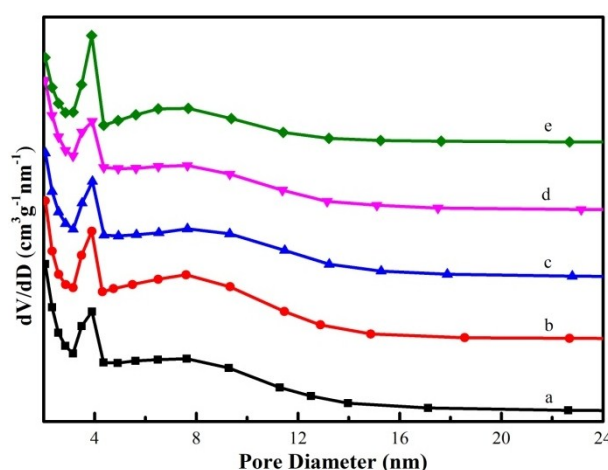

**Fig.S1** BJH pore size distribution curves of the samples. The samples are: (a) Beta, (b) deal-Beta, (c) Sn-Beta, (d) Sn-Beta-NH<sub>2(30)</sub> and (e) Sn-Beta-NH<sub>2(200)</sub>.

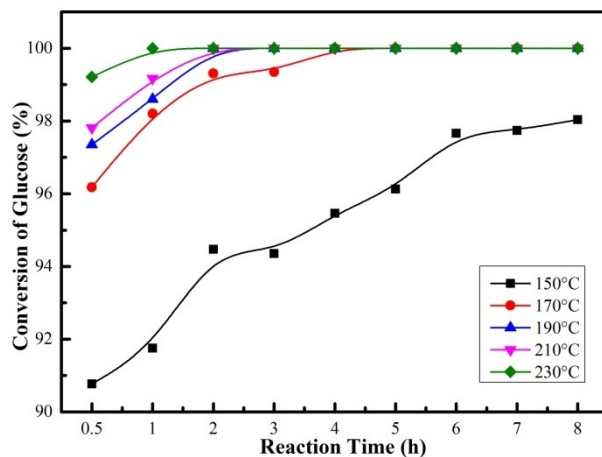

**Fig.S2** Effect of reaction temperature and reaction time on conversion of glucose over Sn-Beta-NH<sub>2(30)</sub> catalyst. Reaction conditions: 225 mg of glucose, 160 mg of catalyst, 10 mL of H<sub>2</sub>O.

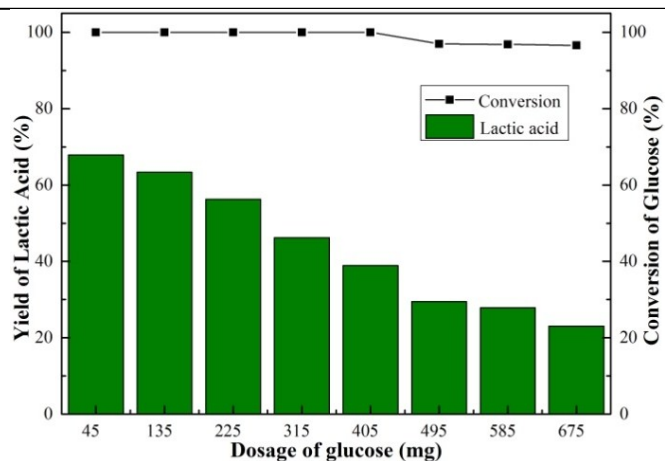

**Fig.S3** Effect of glucose dosage on yield of LA over Sn-Beta-NH<sub>2(30)</sub> catalyst. Reaction conditions: 160 mg of catalyst, 10 mL of H<sub>2</sub>O, 190°C, 2 h

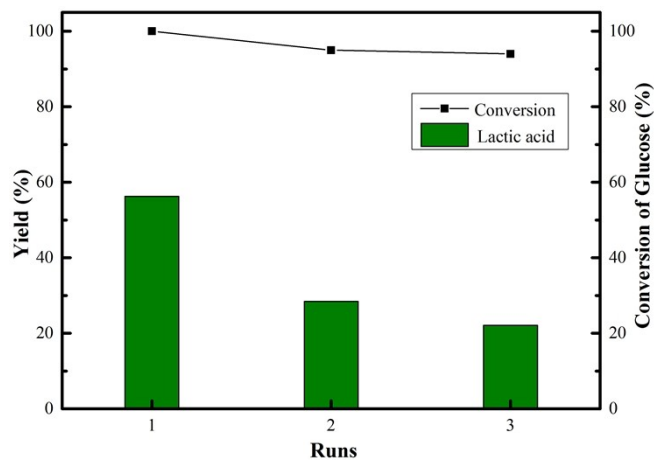

**Fig.S4** Recyclability tests of Sn-Beta-NH<sub>2(30)</sub> catalysts on conversion of glucose. Reaction conditions: 225 mg of glucose, 160 mg of catalyst, 10 mL of H<sub>2</sub>O.

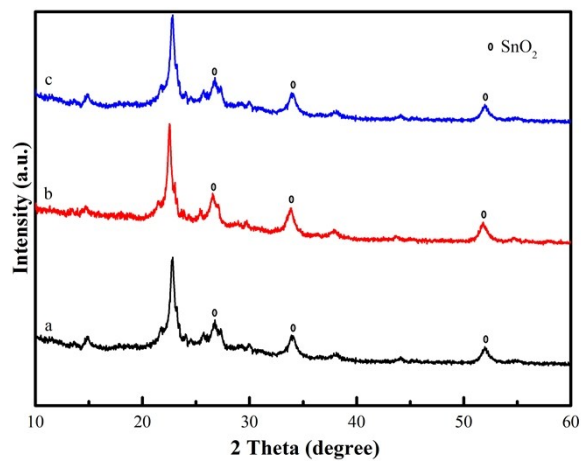

**Fig.S5** Powder XRD patterns of (a) Sn-Beta-NH<sub>2(30)</sub>-1 run, (b) Sn-Beta-NH<sub>2(30)</sub>-2 runs, (c) Sn-Beta-NH<sub>2(30)</sub>-3 runs.

**Table S1** The C and N contents of reusing Sn-Beta-NH<sub>2(30)</sub> catalysts

| Runs | C   | N   |
|------|-----|-----|
|      | wt% | wt% |
| 1    | 2   | 0.2 |
| 2    | 8   | 0.1 |
| 3    | 9   | 0.1 |

Determined by CHN elemental analysis.
